# Supplementary material for: Ca2+ dynamics in oocytes from naturally-aged mice
Source: PubMed Central journal article supplement (PMC4726220; doi:10.1038/srep19357), 2016-01-20
Supplement: srep19357-s1.pdf [file srep19357-s1.pdf]

# Supplementary Information

## Ca<sup>2+</sup> dynamics in oocytes from naturally-aged mice

**Jenna Haverfield<sup>1,2</sup>, Shoma Nakagawa<sup>1</sup>, Daniel Love<sup>3</sup>, Elina Tsihlaki<sup>4</sup>, Michail Nomikos<sup>3</sup>, F. Anthony Lai<sup>3</sup>, Karl Swann<sup>3</sup>, Greg FitzHarris<sup>1,2,4,\*</sup>**

<sup>1</sup>Centre Recherche Centre Hospitalier Université de Montréal, Montreal, Québec, Canada, H2X 0A9.

<sup>2</sup>Department of Obstetrics and Gynaecology, University of Montreal, Montreal, Québec, Canada, H3T 1J4.

<sup>3</sup>Institute of Molecular and Experimental Medicine, Cardiff University School of Medicine, Heath Park, UK, CF14 4XN.

<sup>4</sup>Department of Cell and Developmental Biology, University College London, London, UK, WC1E 6BT.

\*Correspondence should be addressed to: [greg.fitzharris@umontreal.ca](mailto:greg.fitzharris@umontreal.ca)

## Supplementary Fig S1

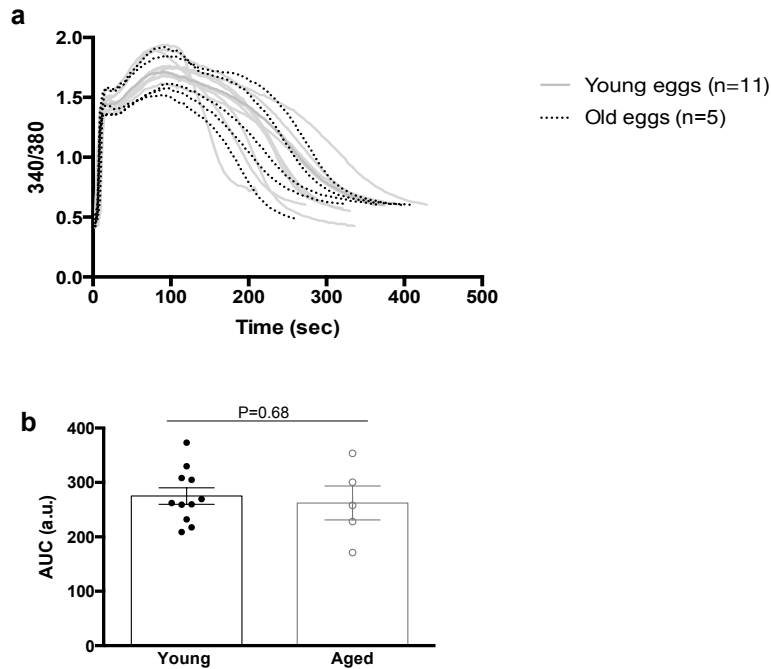

**Supplementary Fig S1:** Ionomycin-releasable  $\text{Ca}^{2+}$  store content is maintained with age. a) Individual  $\text{Ca}^{2+}$  response curves in MII eggs from young and naturally-aged mice after treatment with ionomycin ( $2 \mu\text{M}$ ). b) Area under the curve analysis of the ionomycin response in young ( $n=11$ ,  $275.0 \pm 49.9$ ) and aged ( $n=5$ ,  $262.3 \pm 69.45$ ) eggs, revealing no age-related differences in  $\text{Ca}^{2+}$  content ( $P=0.68$ ). Data are mean  $\pm$  SEM. All eggs were collected from MF1 mice (young at 2 months, aged at  $\sim 18$  months), analysed using Fura2-AM. Data represents two independent experiments with young and aged eggs imaged contemporaneously.
